# Supplementary material
Source: publisher site journal article supplement (https://www.dovepress.com/article/292789)
Supplement: Supplementary file 1 [file get_supplementary_file.php]

**Table S1 Genomic alterations of the three ACC lesions.**

| Sample | Test id                             | Type   | Gene     | Gene.ID   | AACChange             | Chr.start | Chr.end   | Ref    |
|--------|-------------------------------------|--------|----------|-----------|-----------------------|-----------|-----------|--------|
| LLL    | FB20090248-A3A8AA9XNF1-A001L000KA6W | Mutant | PIK3R1   | PIK3R1:NM | c.201dup(p.I68Yfs*8)  | 5:6758818 | 5:6758818 | -      |
| LLL    | FB20090248-A3A8AA9XNF1-A001L000KA6W | Mutant | LYN      | LYN:NM_00 | c.1079G>A(p.R360Q)    | 8:5691093 | 8:5691093 | G      |
| LLL    | FB20090248-A3A8AA9XNF1-A001L000KA6W | Mutant | SPOP     | SPOP:NM_  | c.361C>T(p.R121W)     | 17:476964 | 17:476964 | G      |
| LLL    | FB20090248-A3A8AA9XNF1-A001L000KA6W | Mutant | SETD2    | SETD2:NM_ | c.4929C>G(p.N1643K)   | 3:4714303 | 3:4714303 | G      |
| LLL    | FB20090248-A3A8AA9XNF1-A001L000KA6W | Mutant | FBXW7    | FBXW7:NM  | c.1034C>T(p.T345I)    | 4:1532493 | 4:1532493 | G      |
| LLL    | FB20090248-A3A8AA9XNF1-A001L000KA6W | CNV    | MCL1     | .         | .                     | .         | .         | .      |
| LLL    | FB20090248-A3A8AA9XNF1-A001L000KA6W | MS     | .        | .         | MSS                   | .         | .         | .      |
| LLL    | FB20090248-A3A8AA9XNF1-A001L000KA6W | TMB    | .        | .         | .                     | .         | .         | .      |
| RML    | FB20090249-A3A8AA9XNF1-A001L000KA6W | Mutant | PIK3R1   | PIK3R1:NM | c.201dup(p.I68Yfs*8)  | 5:6758818 | 5:6758818 | -      |
| RML    | FB20090249-A3A8AA9XNF1-A001L000KA6W | MS     | .        | .         | MSS                   | .         | .         | .      |
| RML    | FB20090249-A3A8AA9XNF1-A001L000KA6W | TMB    | .        | .         | .                     | .         | .         | .      |
| RLL    | FB20090250-A3A8AA9XNF1-A001L000KA6W | MS     | .        | .         | MSS                   | .         | .         | .      |
| RLL    | FB20090250-A3A8AA9XNF1-A001L000KA6W | TMB    | .        | .         | .                     | .         | .         | .      |
| Blood  | PB20090247-C5C8AA9XNF1-A001L000KA6W | SNP    | DPYD     | DPYD:NM_  | (c.1627A>G(p.I543V)   | 1:9798139 | 1:9798139 | T      |
| Blood  | PB20090247-C5C8AA9XNF1-A001L000KA6W | SNP    | ERCC1    | ERCC1:NM_ | c.354T>C(p.N118=)     | 19:459236 | 19:459236 | A      |
| Blood  | PB20090247-C5C8AA9XNF1-A001L000KA6W | SNP    | ERCC2    | ERCC2:NM_ | c.2251A>C(p.K751Q)    | 19:458549 | 19:458549 | T      |
| Blood  | PB20090247-C5C8AA9XNF1-A001L000KA6W | SNP    | NQO1     | NQO1:NM_  | c.559C>T(p.P187S)     | 16:697451 | 16:697451 | G      |
| Blood  | PB20090247-C5C8AA9XNF1-A001L000KA6W | SNP    | TYMS 6bp | TYMS:NM_  | (c.*450_*455delAAGTTA | 18:673444 | 18:673449 | TTAAAG |
| Blood  | PB20090247-C5C8AA9XNF1-A001L000KA6W | SNP    | UGT1A1   | UGT1A1:NM | c.211G>A(p.G71R)      | 2:2346691 | 2:2346691 | G      |
| Blood  | PB20090247-C5C8AA9XNF1-A001L000KA6W | SNP    | GSTT1    | .         | .                     | .         | .         | .      |
| Blood  | PB20090247-C5C8AA9XNF1-A001L000KA6W | TMB    | .        | .         | .                     | .         | .         | .      |

| Alt | Hom.Het | ExonicFunc          | rsID       | AF      | CopyNumb | Remarks | targetlevel | chemolevel | Rtlevel | ACMG | FilterCondi |
|-----|---------|---------------------|------------|---------|----------|---------|-------------|------------|---------|------|-------------|
| T   | het     | frameshift_variant  | .          | 29.75%  | .        | .       | level3      | .          | .       | .    | .           |
| A   | het     | missense_variant    | rs20189561 | 10.83%  | .        | .       | level4      | .          | .       | .    | .           |
| A   | het     | missense_variant    | .          | 7.88%   | .        | .       | level4      | .          | .       | .    | .           |
| C   | het     | missense_variant    | .          | 7.56%   | .        | .       | level4      | .          | .       | .    | .           |
| A   | het     | missense_variant    | .          | 7.12%   | .        | .       | level4      | .          | .       | .    | .           |
| .   | .       | .                   | .          | .       | 2.0894   | .       | level3      | level2     | level1  | .    | .           |
| .   | .       | .                   | .          | 42.31%  | .        | .       | .           | .          | .       | .    | .           |
| .   | .       | .                   | .          | 41.51%  | 6.3      | .       | .           | .          | .       | .    | .           |
| T   | het     | frameshift_variant  | .          | 23.71%  | .        | .       | level3      | .          | .       | .    | .           |
| .   | .       | .                   | .          | 9.62%   | .        | .       | .           | .          | .       | .    | .           |
| .   | .       | .                   | .          | 76.60%  | 2.1      | .       | .           | .          | .       | .    | .           |
| .   | .       | .                   | .          | 38.46%  | .        | .       | .           | .          | .       | .    | .           |
| .   | .       | .                   | .          | 100%    | 0        | .       | .           | .          | .       | .    | .           |
| C   | hom     | missense_variant    | rs1801159  | 100.00% | .        | .       | .           | level1     | .       | .    | .           |
| G   | hom     | synonymous_variant  | rs11615    | 99.93%  | .        | .       | .           | level1     | .       | .    | .           |
| G   | het     | missense_variant    | rs13181    | 51.82%  | .        | .       | .           | level1     | .       | .    | .           |
| A   | hom     | missense_variant    | rs1800566  | 99.94%  | .        | .       | .           | level1     | .       | .    | .           |
| -   | hom     | 3_prime_UTR_variant | rs15126431 | 84.56%  | .        | .       | .           | level1     | .       | .    | .           |
| A   | het     | missense_variant    | rs4148323  | 49.16%  | .        | .       | .           | level1     | .       | .    | .           |
| .   | hom     | .                   | .          | .       | .        | .       | .           | level1     | .       | .    | .           |
| .   | .       | .                   | .          | 85.95%  | 1.1      | .       | .           | .          | .       | .    | .           |
